# Supplementary material for: Variation in limb loading magnitude and timing in tetrapods
Source: Oxford University Press journal article supplement (doi:10.1242/jeb.201525), 2019-01-01
Supplement: jeb201525supp.pdf [file jeb201525supp.pdf]

**Table S1. Statistical parameters derived from linear mixed-effects models demonstrating the statistical importance of various fixed effects. Values in bold illustrate fixed effects that significantly influence each respective response variable.**

| Response variable                 | Fixed effect                    | Estimate | Standard Error | <i>t</i> value | <i>F</i> value | <i>P</i> value |
|-----------------------------------|---------------------------------|----------|----------------|----------------|----------------|----------------|
| Peak braking force <i>CV</i> *    | (Intercept)                     | 1.28     | 0.17           | -              | -              | -              |
|                                   | Golgi tendon organ morphology   | 0.58     | 0.09           | 6.56           | 37.19          | < <b>0.001</b> |
|                                   | Substrate                       | 0.27     | 0.08           | 3.43           | 10.24          | <b>0.002</b>   |
|                                   | Dimensionless speed             | -0.04    | 0.14           | -0.27          | 0.02           | 0.892          |
|                                   | Count                           | 0.00     | 0.00           | 1.26           | 1.71           | 0.195          |
|                                   | Dimensionless speed <i>CV</i> * | 0.12     | 0.07           | 1.71           | 2.41           | 0.123          |
|                                   | Mass                            | -0.08    | 0.05           | -1.55          | 2.16           | 0.148          |
| Peak propulsive force <i>CV</i> * | (Intercept)                     | 1.11     | 0.14           | -              | -              | -              |
|                                   | Golgi tendon organ morphology   | 0.44     | 0.08           | 5.45           | 29.72          | < <b>0.001</b> |
|                                   | Substrate                       | 0.10     | 0.07           | 1.37           | 1.87           | 0.178          |
|                                   | Dimensionless speed             | 0.00     | 0.13           | 0.03           | 0.00           | 0.979          |
|                                   | Count                           | 0.00     | 0.00           | 1.72           | 2.97           | 0.088          |
|                                   | Dimensionless speed <i>CV</i> * | 0.15     | 0.05           | 2.78           | 7.72           | <b>0.006</b>   |
|                                   | Mass                            | -0.05    | 0.04           | -1.03          | 1.07           | 0.306          |
| Peak medial force <i>CV</i> *     | (Intercept)                     | 1.53     | 0.16           | -              | -              | -              |
|                                   | Golgi tendon organ morphology   | 0.24     | 0.08           | 2.96           | 8.74           | <b>0.005</b>   |
|                                   | Substrate                       | -0.07    | 0.07           | -0.95          | 0.90           | 0.349          |
|                                   | Dimensionless speed             | 0.07     | 0.13           | 0.53           | 0.28           | 0.597          |
|                                   | Count                           | 0.01     | 0.00           | 3.08           | 9.50           | <b>0.003</b>   |
|                                   | Dimensionless speed <i>CV</i> * | 0.07     | 0.06           | 1.18           | 1.38           | 0.241          |
|                                   | Mass                            | 0.06     | 0.05           | 1.23           | 1.50           | 0.227          |
| Peak lateral force <i>CV</i> *    | (Intercept)                     | 1.59     | 0.14           | -              | -              | -              |
|                                   | Golgi tendon organ morphology   | 0.16     | 0.08           | 2.04           | 4.17           | <b>0.047</b>   |

|                                                        |                                 |       |       |       |       |                |
|--------------------------------------------------------|---------------------------------|-------|-------|-------|-------|----------------|
|                                                        | Substrate                       | 0.32  | 0.07  | 4.74  | 22.49 | < <b>0.001</b> |
|                                                        | Dimensionless speed             | 0.25  | 0.12  | 2.05  | 4.20  | <b>0.046</b>   |
|                                                        | Count                           | 0.01  | 0.00  | 2.94  | 8.66  | <b>0.004</b>   |
|                                                        | Dimensionless speed <i>CV</i> * | 0.03  | 0.06  | 0.59  | 0.35  | 0.555          |
|                                                        | Mass                            | -0.09 | 0.05  | -1.90 | 3.60  | 0.063          |
|                                                        | Contact time                    | 0.38  | 0.16  | 2.35  | 5.52  | <b>0.022</b>   |
|                                                        | (Intercept)                     | 0.72  | 0.15  | -     | -     | -              |
| Peak vertical force <i>CV</i> *                        | Golgi tendon organ morphology   | 0.24  | 0.09  | 2.56  | 6.57  | <b>0.014</b>   |
|                                                        | Substrate                       | -0.12 | 0.08  | -1.48 | 2.18  | 0.147          |
|                                                        | Dimensionless speed             | 0.11  | 0.14  | 0.75  | 0.56  | 0.458          |
|                                                        | Count                           | 0.00  | 0.00  | 1.59  | 2.54  | 0.114          |
|                                                        | Dimensionless speed <i>CV</i> * | 0.26  | 0.05  | 4.77  | 22.72 | < <b>0.001</b> |
|                                                        | Mass                            | -0.04 | 0.05  | -0.83 | 0.68  | 0.413          |
|                                                        | Contact time                    | -0.10 | 0.19  | -0.51 | 0.26  | 0.609          |
| Timing of peak braking force <i>CV</i> *               | (Intercept)                     | 1.43  | 0.12  | -     | -     | -              |
|                                                        | Golgi tendon organ morphology   | 0.33  | 0.08  | 4.39  | 19.27 | < <b>0.001</b> |
|                                                        | Substrate                       | 0.17  | 0.07  | 2.49  | 6.22  | <b>0.016</b>   |
|                                                        | Dimensionless speed             | -0.06 | 0.11  | -0.57 | 0.32  | 0.573          |
|                                                        | Count                           | 0.00  | 0.00  | 0.69  | 0.48  | 0.491          |
|                                                        | Dimensionless speed <i>CV</i> * | 0.09  | 0.04  | 2.17  | 4.70  | <b>0.032</b>   |
|                                                        | Mass                            | -0.14 | 0.04  | -3.17 | 10.08 | <b>0.002</b>   |
| Contact time                                           | 0.24                            | 0.15  | 1.59  | 2.52  | 0.116 |                |
| Timing of braking to propulsive transition <i>CV</i> * | (Intercept)                     | 1.12  | 0.12  | -     | -     | -              |
|                                                        | Golgi tendon organ morphology   | 0.39  | 0.07  | 5.49  | 27.62 | < <b>0.001</b> |
|                                                        | Substrate                       | 0.40  | 0.06  | 6.25  | 34.45 | < <b>0.001</b> |
|                                                        | Dimensionless speed             | -0.19 | 0.11  | -1.73 | 2.67  | 0.11           |
|                                                        | Count                           | 0.00  | 0.00  | 0.48  | 0.29  | 0.59           |
|                                                        | Dimensionless speed <i>CV</i> * | 0.05  | 0.04  | 1.26  | 1.77  | 0.19           |
|                                                        | Mass                            | -0.17 | 0.04  | -4.03 | 13.81 | < <b>0.001</b> |
| Contact time                                           | 0.09                            | 0.15  | -0.61 | 0.28  | 0.60  |                |
| Timing of peak                                         | (Intercept)                     | 0.78  | 0.13  | -     | -     | -              |
|                                                        | Golgi tendon organ morphology   | 0.40  | 0.07  | 5.84  | 34.09 | < <b>0.001</b> |

|                                   |                               |       |      |       |       |                |
|-----------------------------------|-------------------------------|-------|------|-------|-------|----------------|
| propulsive force CV*              | Substrate                     | 0.35  | 0.06 | 5.84  | 34.05 | < <b>0.001</b> |
|                                   | Dimensionless speed           | -0.19 | 0.11 | -1.78 | 3.16  | 0.083          |
|                                   | Count                         | 0.00  | 0.00 | -0.27 | 0.07  | 0.788          |
|                                   | Dimensionless speed CV*       | 0.14  | 0.05 | 2.69  | 7.25  | <b>0.008</b>   |
|                                   | Mass                          | -0.12 | 0.04 | -2.94 | 8.66  | <b>0.005</b>   |
|                                   | Contact time                  | 0.05  | 0.15 | 0.36  | 0.13  | 0.722          |
| Timing of peak medial force CV*   | (Intercept)                   | 1.80  | 0.16 | -     | -     | -              |
|                                   | Golgi tendon organ morphology | 0.22  | 0.10 | 2.31  | 5.32  | <b>0.025</b>   |
|                                   | Substrate                     | 0.03  | 0.09 | 0.33  | 0.11  | 0.743          |
|                                   | Dimensionless speed           | -0.06 | 0.15 | -0.43 | 0.19  | 0.668          |
|                                   | Count                         | 0.00  | 0.00 | 0.98  | 0.96  | 0.329          |
|                                   | Dimensionless speed CV*       | -0.11 | 0.06 | -1.88 | 3.53  | 0.062          |
|                                   | Mass                          | 0.02  | 0.06 | 0.30  | 0.09  | 0.762          |
|                                   | Contact time                  | 0.01  | 0.20 | 0.04  | 0.00  | 0.967          |
| Timing of peak lateral force CV*  | (Intercept)                   | 1.97  | 0.12 | -     | -     | -              |
|                                   | Golgi tendon organ morphology | -0.10 | 0.06 | -1.75 | 3.06  | 0.087          |
|                                   | Substrate                     | 0.33  | 0.05 | 6.24  | 38.95 | < <b>0.001</b> |
|                                   | Dimensionless speed           | 0.07  | 0.09 | 0.79  | 0.63  | 0.433          |
|                                   | Count                         | 0.00  | 0.00 | 2.53  | 6.38  | <b>0.015</b>   |
|                                   | Dimensionless speed CV*       | -0.13 | 0.05 | -2.72 | 7.42  | <b>0.007</b>   |
|                                   | Mass                          | -0.07 | 0.04 | -1.85 | 3.42  | 0.071          |
|                                   | Contact time                  | 0.48  | 0.13 | 3.77  | 14.20 | < <b>0.001</b> |
| Timing of peak vertical force CV* | (Intercept)                   | 1.59  | 0.15 | -     | -     | -              |
|                                   | Golgi tendon organ morphology | 0.01  | 0.09 | 0.13  | 0.02  | 0.896          |
|                                   | Substrate                     | -0.09 | 0.08 | -1.11 | 1.23  | 0.273          |
|                                   | Dimensionless speed           | 0.06  | 0.14 | 0.41  | 0.17  | 0.682          |
|                                   | Count                         | 0.00  | 0.00 | 1.09  | 1.18  | 0.280          |
|                                   | Dimensionless speed CV*       | -0.03 | 0.05 | -0.60 | 0.36  | 0.547          |
|                                   | Mass                          | -0.13 | 0.05 | -2.56 | 6.53  | <b>0.013</b>   |
|                                   | Contact time                  | 0.24  | 0.18 | 1.36  | 1.84  | 0.179          |

Information not pertinent.

**Table S2: Evolutionary models fit to log<sub>10</sub> limb loading and stride cycle CV\* with intraspecific sampling included in the model.** Bolded models have the most support. Values presented are mean ± standard deviation based on running the analysis on 100 trees to account for phylogenetic uncertainty. Variables defined as follows:  $\sigma^2$  = Brownian motion rate parameter,  $\alpha$  = strength of pull towards trait optimum under OU model,  $T_{1/2}$  = phylogenetic half-life,  $\theta$  = trait optima. Models as follows: BM1 = single rate Brownian motion, BM-M = two rate Brownian motion, OU-1 = single optimum Ornstein-Uhlenbeck, OU-M = two optima Ornstein-Uhlenbeck.

| Variable                  | Model       | $\sigma$                                         | $\alpha$       | $T_{1/2}$ | $\theta$                   | Akaike's information criterion | Akaike Weights   |
|---------------------------|-------------|--------------------------------------------------|----------------|-----------|----------------------------|--------------------------------|------------------|
| Peak braking force CV*    | BM1         | 1.7e-04±6.4e-07                                  |                |           | 1.5±0.00                   | 78.1±0.02                      | 0.21±0.00        |
|                           | <b>BM-M</b> | <b>1.5e-11±3.1e-11</b><br><b>5.0e-04±2.9e-06</b> |                |           | <b>1.7±0.00</b>            | <b>77.1±0.04</b>               | <b>0.34±0.00</b> |
|                           | OU-1        | 6.0e-04±2.6e-06                                  | 0.0077±0.00003 | 90        | 1.5±0.00                   | 79.0±0.03                      | 0.13±0.00        |
|                           | OU-M        | 3.9e-04±2.1e-06                                  | 0.0110±0.00005 | 63        | 1.7±0.00 1.2±0.00          | 77.2±0.01                      | 0.32±0.00        |
| Peak propulsive force CV* | <b>BM1</b>  | <b>9.5e-19±9.4e-18</b>                           |                |           | <b>1.5±0.00</b>            | <b>48.3±0.00</b>               | <b>0.56±0.00</b> |
|                           | BM-M        | 1.7e-16±6.6e-16<br>1.9e-15±1.1e-14               |                |           | 1.5±0.00                   | 50.5±0.00                      | 0.18±0.00        |
|                           | OU-1        | 5.3e-21±5.7e-21                                  | 0.0084±0.00002 | 83        | 1.5±0.00                   | 50.5±0.00                      | 0.18±0.00        |
|                           | OU-M        | 3.4e-13±9.4e-13                                  | 1.2e-8±1.6e-8  | 5.8e7     | 1.5±0.00,<br>1.4e5±2.0e5   | 52.4±0.00                      | 0.07±0.00        |
| Peak medial force CV*     | <b>BM1</b>  | <b>2.5e-19±1.7e-18</b>                           |                |           | <b>1.7±0.00</b>            | <b>64.1±0.00</b>               | <b>0.57±0.00</b> |
|                           | BM-M        | 2.3e-15±6.9e-15<br>4.8e-15±1.0e-14               |                |           | 1.7±0.00                   | 66.3±0.00                      | 0.19±0.00        |
|                           | OU-1        | 7.9e-22 ±1.6e-22                                 | 0.0073±6.0e-6  | 95        | 1.7±0.00                   | 66.3±0.00                      | 0.19±0.00        |
|                           | OU-M        | 3.4e-12±7.6e-12                                  | 1.2e-8±1.8e-8  | 5.8e7     | 1.7±0.00<br>-3.1e5±3.8e+05 | 68.5±0.00                      | 0.06±0.00        |
|                           | <b>BM1</b>  | <b>3.7e-17 ± 3.6e-16</b>                         |                |           | <b>1.6±0.00</b>            | <b>55.0±0.00</b>               | <b>0.57±0.00</b> |

|                                                |             |                                                  |                     |              |                           |                  |                  |
|------------------------------------------------|-------------|--------------------------------------------------|---------------------|--------------|---------------------------|------------------|------------------|
| Peak lateral force CV*                         | BM-M        | 6.2e-16 ±2.3e-15<br>7.3e-16 ±1.8e-15             |                     |              | 1.6±0.00                  | 57.3±0.00        | 0.19±0.00        |
|                                                | OU-1        | 4.1e-20 ±2.9e-20                                 | 0.0074±3.8e-6       | 94           | 1.6±0.00                  | 57.3±0.00        | 0.19±0.00        |
|                                                | OU-M        | 3.8e-13±2.1e-12                                  | 9.5e-9±8.7e-9       | 7.2e7        | 1.7±0.00,<br>-1.9e5±2.2e5 | 59.5±0.00        | 0.06±0.00        |
| Peak vertical force CV*                        | BM1         | 5.6e-05±4.3e-07                                  |                     |              | 1.1±0.00                  | 29.5±0.03        | 0.23±0.00        |
|                                                | <b>BM-M</b> | <b>5.2e-12±9.5e-12</b><br><b>3.0e-04±3.6e-06</b> |                     |              | <b>1.0±0.00</b>           | <b>28.0±0.06</b> | <b>0.50±0.01</b> |
|                                                | OU-1        | 5.6e-05±3.2e-07                                  | 2.2e-6±3.8e-6       | 3.2e5        | 1.1±0.00                  | 31.7±0.03        | 0.08±0.00        |
|                                                | OU-M        | 1.5e-10±2.3e-10                                  | 1.4e-8±2.5e-8       | 5.0e7        | 0.7±0.00,<br>1.7e6±1.9e6  | 29.9±0.00        | 0.19±0.00        |
| Timing of peak braking force CV*               | BM1         | 3.8e-05±2.1e-07                                  |                     |              | 1.5±0.00                  | 65.5±0.01        | 0.33±0.00        |
|                                                | BM-M        | 3.6e-13±1.7e-12<br>1.4e-04±4.9e-06               |                     |              | 1.6±0.00                  | 67.5±0.05        | 0.12±0.00        |
|                                                | OU-1        | 2.6e-04±8.4e-06                                  | 0.0099±0.150        | 70           | 1.5±0.00                  | 67.1±0.02        | 0.15±0.00        |
|                                                | <b>OU-M</b> | <b>2.1e-10±1.5e-09</b>                           | <b>0.0003±0.012</b> | <b>2.3e3</b> | <b>1.7±0.00, 1.4±0.00</b> | <b>65.1±0.00</b> | <b>0.40±0.00</b> |
| Timing of braking to propulsive transition CV* | BM1         | 7.3e-05 ±7.7e-07                                 |                     |              | 1.3±0.00                  | 64.1±0.03        | 0.19±0.00        |
|                                                | BM-M        | 6.1e-05±5.0e-05<br>1.2e-04±1.2e-04               |                     |              | 1.3±0.03                  | 66.0±0.33        | 0.07±0.01        |
|                                                | OU-1        | 8.1e-02 ±1.8e-01                                 | 1.2±2.7             | 0.6          | 1.2±0.00                  | 63.3±0.03        | 0.28±0.00        |
|                                                | <b>OU-M</b> | <b>6.2e-02±1.3e-01</b>                           | <b>1.1±2.4</b>      | <b>0.6</b>   | <b>1.4±0.00, 1.2±0.00</b> | <b>62.3±0.01</b> | <b>0.45±0.01</b> |
| Timing of peak propulsive force CV*            | BM1         | 0.00057±1.6e-05                                  |                     |              | 1.2±0.00                  | 71.1±0.59        | 0.00±0.00        |
|                                                | BM-M        | 0.00009±3.1e-06<br>0.00097±3.6e-05               |                     |              | 1.2±0.00                  | 68.7±0.55        | 0.01±0.00        |
|                                                | OU-1        | 0.17000±3.1e-01                                  | 1.4±2.6             | 0.5          | 1.1±0.00                  | 60.0±0.19        | 0.48±0.01        |
|                                                | <b>OU-M</b> | <b>0.33000±8.3e-01</b>                           | <b>3.0±7.4</b>      | <b>0.2</b>   | <b>1.3±0.00, 1.1±0.00</b> | <b>59.9±0.15</b> | <b>0.51±0.01</b> |
| Timing of peak medial force CV*                | <b>BM1</b>  | <b>1.5e-19±1.4e-18</b>                           |                     |              | <b>1.7±0.00</b>           | <b>76.3±0.00</b> | <b>0.54±0.02</b> |
|                                                | BM-M        | 1.4e-11± 3.4e-11<br>1.1e-05± 1.0e-05             |                     |              | 1.7±0.00                  | 78.5±0.01        | 0.18±0.02        |
|                                                | OU-1        | 4.9e-18 ±8.1e-18                                 | 0.008±0.00001       | 87           | 1.7±0.00                  | 78.5±0.00        | 0.18±0.00        |
|                                                | OU-M        | 3.2e-10±1.8e-09                                  | 0.120±0.018         | 6            | 1.8±0.00, 1.7±0.00        | 79.6±0.00        | 0.11±0.00        |

|                                   |             |                                      |                    |            |                           |                  |                  |
|-----------------------------------|-------------|--------------------------------------|--------------------|------------|---------------------------|------------------|------------------|
| Timing of peak lateral force CV*  | BM1         | 4.6e-05±8.1e-06                      |                    |            | 1.5±0.03                  | 73.6±0.37        | 0.29±0.03        |
|                                   | BM-M        | 2.5e-11±5.3e-11<br>1.2e-04±6.7e-07   |                    |            | 1.5±0.00                  | 74.8±0.01        | 0.16±0.01        |
|                                   | OU-1        | 7.1e-04±4.8e-05                      | 0.030±0.002        | 23         | 1.5±0.00                  | 74.8±0.01        | 0.16±0.01        |
|                                   | <b>OU-M</b> | <b>6.3e-04±6.4e-06</b>               | <b>0.002±0.001</b> | <b>347</b> | <b>1.9±0.00, 1.5±0.00</b> | <b>73.0±0.00</b> | <b>0.39±0.02</b> |
| Timing of peak vertical force CV* | <b>BM1</b>  | <b>3.1e-05±3.1e-07</b>               |                    |            | <b>1.3±0.00</b>           | <b>52.3±0.02</b> | <b>0.52±0.00</b> |
|                                   | BM-M        | 7.8e-12 ±1.8e-11<br>1.3e-04 ±2.1e-06 |                    |            | 1.3±0.00                  | 53.7±0.07        | 0.25±0.00        |
|                                   | OU-1        | 5.6e-05±4.1e-06                      | 0.0021±0.0003      | 330        | 1.3±0.00                  | 54.5±0.03        | 0.17±0.00        |
|                                   | OU-M        | 5.6e-05±4.1e-06                      | 0.0020±0.0003      | 347        | 1.3±0.00, 1.3±0.01        | 56.8±0.03        | 0.05±0.00        |
| Stride cycle duration CV*         | BM1         | 1.7e-04±1.3e-06                      |                    |            | 1.1±0.00                  | 29.8±0.14        | 0.15±0.01        |
|                                   | BM-M        | 8.3e-05±8.0e-07<br>3.4e-04±4.0e-06   |                    |            | 1.1±0.00                  | 29.3±0.14        | 0.20±0.01        |
|                                   | <b>OU-1</b> | <b>9.0e-04±6.8e-05</b>               | <b>0.015±0.001</b> | <b>46</b>  | <b>1.2±0.00</b>           | <b>28.3±0.13</b> | <b>0.34±0.01</b> |
|                                   | OU-M        | 1.2e-03±1.3e-03                      | 0.024±0.028        | 29         | 1.1±0.00, 1.2±0.00        | 28.5±0.14        | 0.30±0.01        |

**Table S3: Type I error and, statistical power computed from simulations based on the OU-M models fit to each variable.** Selection opportunity ( $\eta$ ), the discriminability ratio ( $\phi$ ) and the signal to noise ratio (SNR) were computed using equations from Cressler et al. (2015).

|                                  |               | Type I error | Power | $\eta$  | $\phi$  | SNR     |
|----------------------------------|---------------|--------------|-------|---------|---------|---------|
| Raw with standard error included | Peak Brake    | 0.15         | 1.00  | 3.9E+00 | 1.9E+02 | 3.7E+02 |
|                                  | Peak Accel    | 0.17         | 1.00  | 4.2E-06 | 6.4E+13 | 1.3E+11 |
|                                  | Peak Vertical | 0.05         | 1.00  | 3.3E-06 | 6.9E+13 | 1.3E+11 |
|                                  | Peak Lateral  | 0.1          | 1.00  | 4.2E-06 | 1.4E+13 | 2.9E+10 |
|                                  | Peak Medial   | 0.12         | 1.00  | 4.9E-06 | 1.9E+12 | 4.2E+09 |
|                                  | Time Brake    | 0.26         | 1.00  | 3.9E+02 | 4.8E+00 | 9.4E+01 |
|                                  | Time Accel    | 0.15         | 1.00  | 1.1E-01 | 3.5E+07 | 1.1E+07 |
|                                  | Time Vertical | 0.22         | 1.00  | 7.0E-01 | 4.0E+01 | 3.4E+01 |
|                                  | Time Lateral  | 0.17         | 1.00  | 4.2E+01 | 1.5E+08 | 9.9E+08 |
|                                  | Time Medial   | 0.22         | 1.00  | 7.0E-01 | 0.0E+00 | 0.0E+00 |
|                                  | Time BP       | 0.13         | 1.00  | 1.1E+03 | 1.5E+00 | 4.8E+01 |
|                                  | Cycle         | 0.24         | 1.00  | 8.4E+00 | 1.8E+01 | 5.3E+01 |
| Residual without standard error  | Peak Brake    | 0.16         | 0.99  | 2.1E+00 | 7.1E+01 | 1.0E+02 |
|                                  | Peak Accel    | 0.25         | 1.00  | 7.4E+00 | 4.7E+01 | 1.3E+02 |
|                                  | Peak Vertical | 0.17         | 1.00  | 5.6E+01 | 7.0E+00 | 5.2E+01 |
|                                  | Peak Lateral  | 0.15         | 1.00  | 2.5E+01 | 3.3E+00 | 1.7E+01 |
|                                  | Peak Medial   | 0.17         | 1.00  | 7.0E+00 | 1.1E+01 | 3.0E+01 |
|                                  | Time Brake    | 0.19         | 1.00  | 9.9E+00 | 2.3E+01 | 7.2E+01 |
|                                  | Time Accel    | 0.06         | 1.00  | 1.9E+02 | 8.7E-01 | 1.2E+01 |
|                                  | Time Vertical | 0.23         | 1.00  | 4.9E+00 | 1.1E+01 | 2.5E+01 |
|                                  | Time Lateral  | 0.22         | 1.00  | 2.2E+01 | 1.9E+00 | 9.0E+00 |
|                                  | Time Medial   | 0.18         | 1.00  | 8.1E+00 | 5.2E-01 | 1.5E+00 |
|                                  | Time BP       | 0.21         | 1.00  | 1.2E+01 | 1.4E+01 | 4.9E+01 |
|                                  | Cycle         | 0.15         | 1.00  | 3.5E+03 | 1.4E+00 | 3.9E+00 |

**Supplementary Figures:**

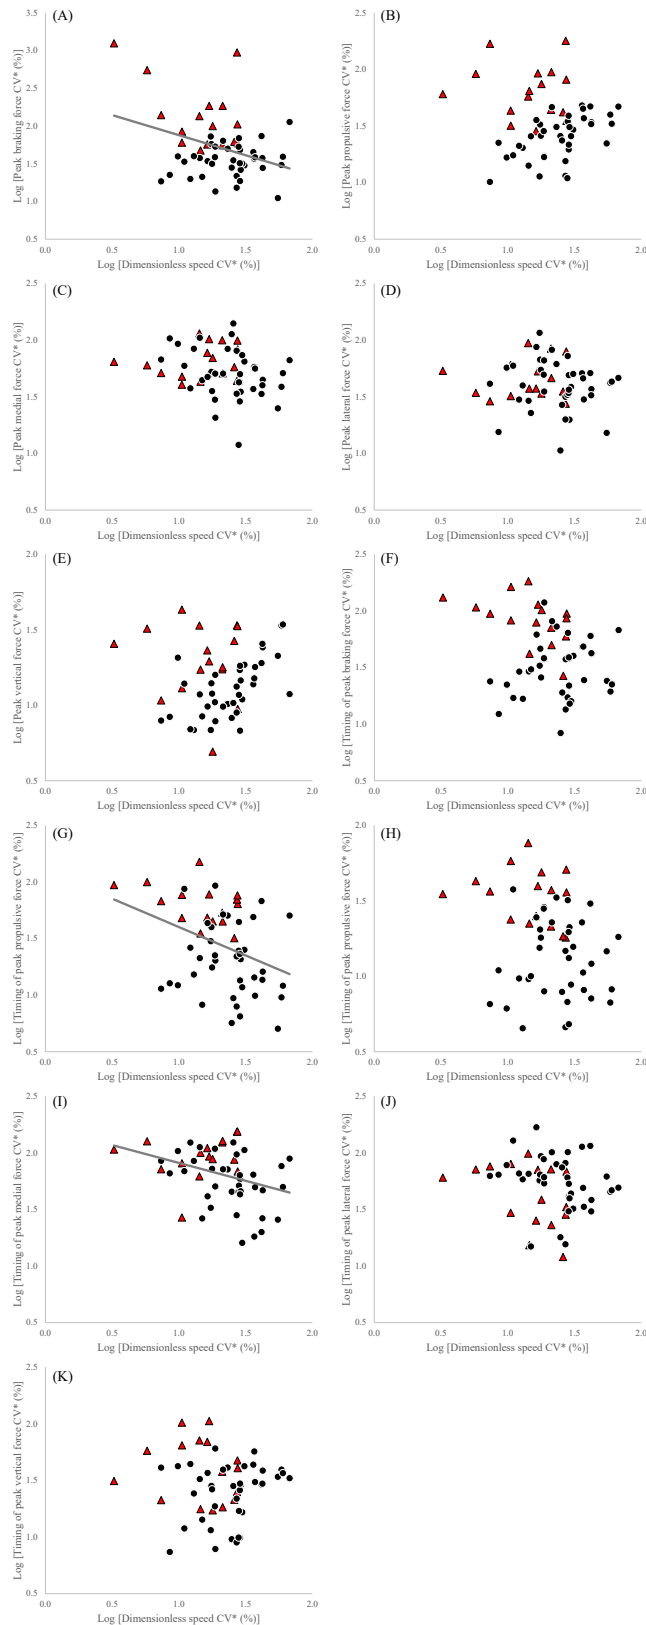

**Supplemental Fig. 1. Scatterplots of the species-mean log-transformed coefficient of variation ( $CV^*$ ) of (A) braking peak force, (B) propulsive peak force, (C) medial peak force, (D) lateral peak force, (E) vertical peak force, (F) timing of braking peak force, (G) timing of the braking to propulsive transition, (H) timing of propulsive peak force, (I) timing of medial peak force, (J) timing of lateral peak force, and (K) timing of vertical peak force as a function of species-mean log-transformed dimensionless speed  $CV^*$  (%). There is a significant negative relationship between species-mean log-transformed dimensionless speed  $CV^*$  (m/s) and peak braking force  $CV^*$  ( $y = -0.53x + 2.41$ ;  $P = 0.008$ ), the braking to propulsive transition  $CV^*$  ( $y = -0.50x + 2.10$ ;  $P = 0.007$ ) and the timing of peak medial force  $CV^*$  ( $y = -0.31x + 2.22$ ;  $P = 0.011$ ). Species with encapsulated Golgi tendon organs (GTO) are illustrated as black circles and species with unencapsulated GTOs are red triangles.**



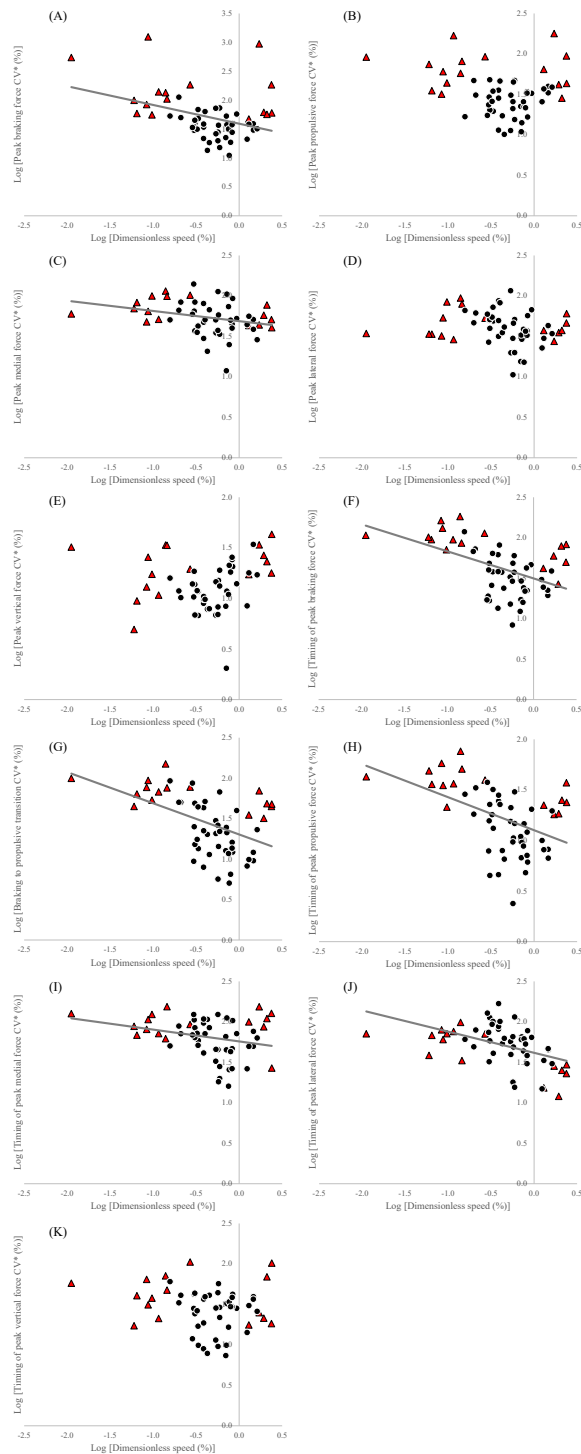

**Supplemental Fig. 2. Scatterplots of the species-mean log-transformed coefficient of variation ( $CV^*$ ) of (A) braking peak force, (B) propulsive peak force, (C) medial peak force, (D) lateral peak force, (E) vertical peak force, (F) timing of braking peak force, (G) timing of the braking to propulsive transition, (H) timing of propulsive peak force, (I) timing of medial peak force, (J) timing of lateral peak force, and (K) timing of vertical peak force as a function of species-mean log-transformed dimensionless speed. There is a significant negative relationship between species-mean log-transformed dimensionless speed (m/s) and peak braking force  $CV^*$  ( $y = -0.32x + 1.59$ ;  $P = 0.005$ ), peak medial force  $CV^*$  ( $y = -0.13x + 1.69$ ;  $P = 0.035$ ), the timing of peak braking force  $CV^*$  ( $y = -0.33x + 1.50$ ;  $P < 0.001$ ), the braking to , propulsive transition  $CV^*$  ( $y = -0.39x + 1.30$ ;  $P < 0.001$ ), the timing of peak propulsive force  $CV^*$  ( $y = -0.33x + 1.10$ ;  $P < 0.001$ ), the timing of peak medial force  $CV^*$  ( $y = -0.15x + 1.76$ ;  $P = 0.041$ ), and the timing of peak lateral force  $CV^*$  ( $y = -0.26x + 1.62$ ;  $P < 0.001$ ). Species with encapsulated Golgi tendon organs (GTO) are illustrated as black circles and species with unencapsulated GTOs are red triangles.**

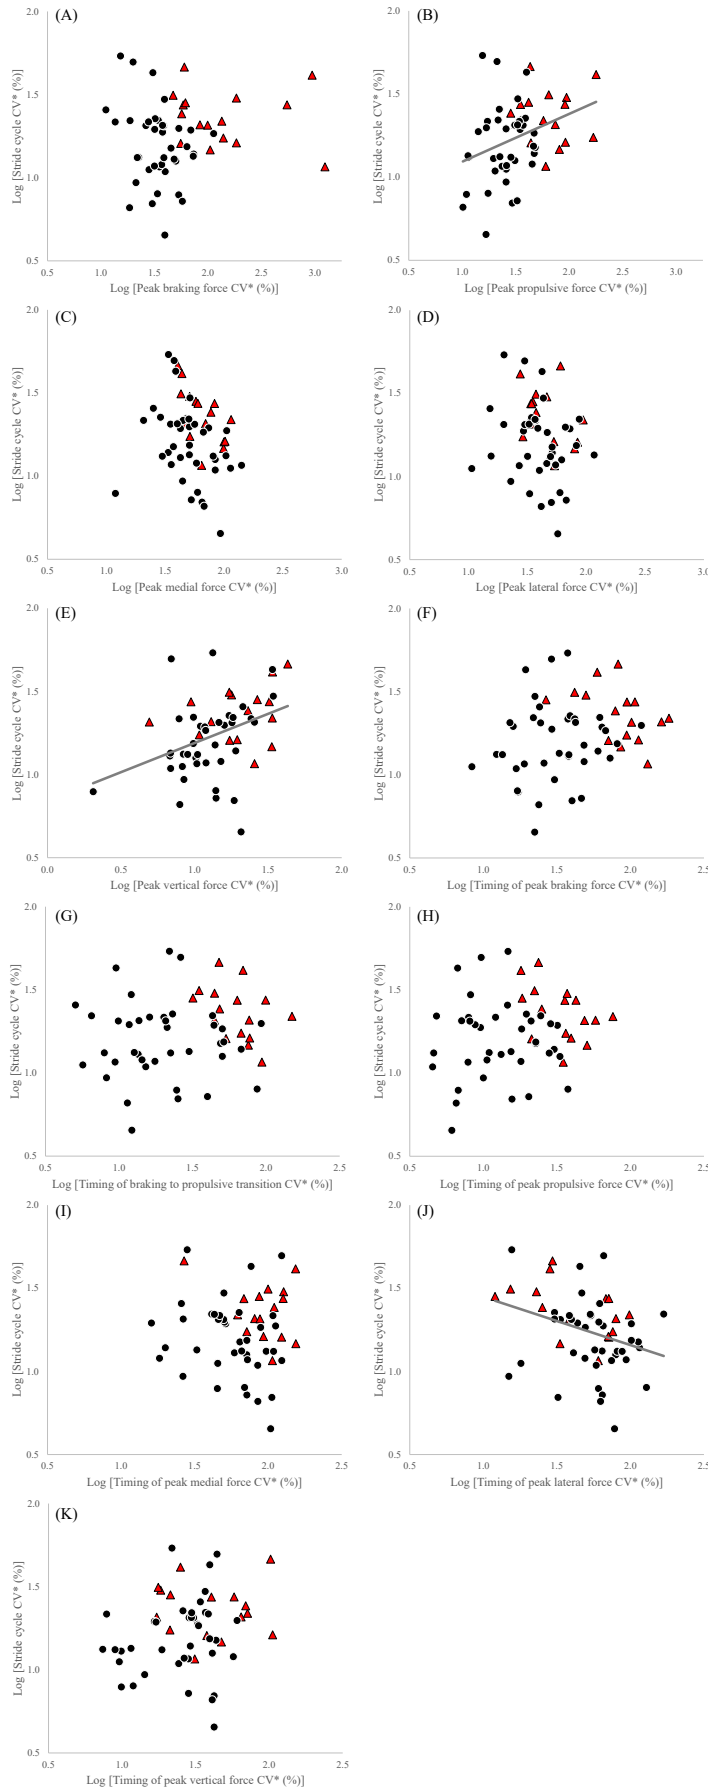

**Supplemental Fig. 3. Scatterplots of the log-transformed species-mean coefficient of variation ( $CV^*$ ) of stride cycle duration as a function of log-transformed  $CV^*$  of (A) braking peak force, (B) propulsive peak force, (C) medial peak force, (D) lateral peak force, (E) vertical peak force, (F) timing of braking peak force, (G) timing of the braking to propulsive transition, (H) timing of propulsive peak force, (I) timing of medial peak force, (J) timing of lateral peak force, and (K) timing of vertical peak force. There is a significant relationship between  $CV^*$  of stride cycle duration and peak propulsive force  $CV^*$  ( $y = 0.29x + 0.81$ ;  $P = 0.009$ ), peak vertical force  $CV^*$  ( $y = 0.35x + 0.84$ ;  $P = 0.005$ ) and the timing of peak lateral force  $CV^*$  ( $y = -0.29x + 1.74$ ;  $P = 0.016$ ). The solid line in each graph represents the best fit line. Species with encapsulated Golgi tendon organs (GTO) are illustrated as black circles and species with unencapsulated GTOs are red triangles.**
